# Supplementary material for: Structural, spectroscopic, and electrochemical properties of tri- and tetradentate N3 and N3S copper complexes with mixed benzimidazole/thioether donors
Source: Royal Society of Chemistry journal article supplement (doi:10.1039/c2dt30756a), 2012-01-01
Supplement: c2dt30756a.pdf [file c2dt30756a.pdf]

## Electronic Supplementary Information (ESI)

For

### Structural, spectroscopic, and electrochemical properties of tri- and tetradentate N<sub>3</sub> and N<sub>3</sub>S Copper complexes with mixed benzimidazole/thioether donors

Ivan Castillo,<sup>\*,†</sup> Víctor M. Ugalde-Saldívar,<sup>‡</sup> Laura A. Rodríguez Solano,<sup>†</sup> Brenda N. Sánchez Eguía,<sup>†</sup> Erica Zeglio,<sup>§</sup> Ebbe Nordlander<sup>§</sup>

<sup>†</sup>*Instituto de Química, Universidad Nacional Autónoma de México, Circuito Exterior, Ciudad Universitaria, México, D. F., 04510, México.*

<sup>‡</sup>*Facultad de Química, División de Estudios de Posgrado, Universidad Nacional Autónoma de México, Ciudad Universitaria, México, D. F., 04510, México.*

<sup>§</sup>*Inorganic Chemistry Research Group, Chemical Physics, Center for Chemistry and Chemical Engineering, Lund University, Box 124, SE-221 00 Lund, Sweden.*

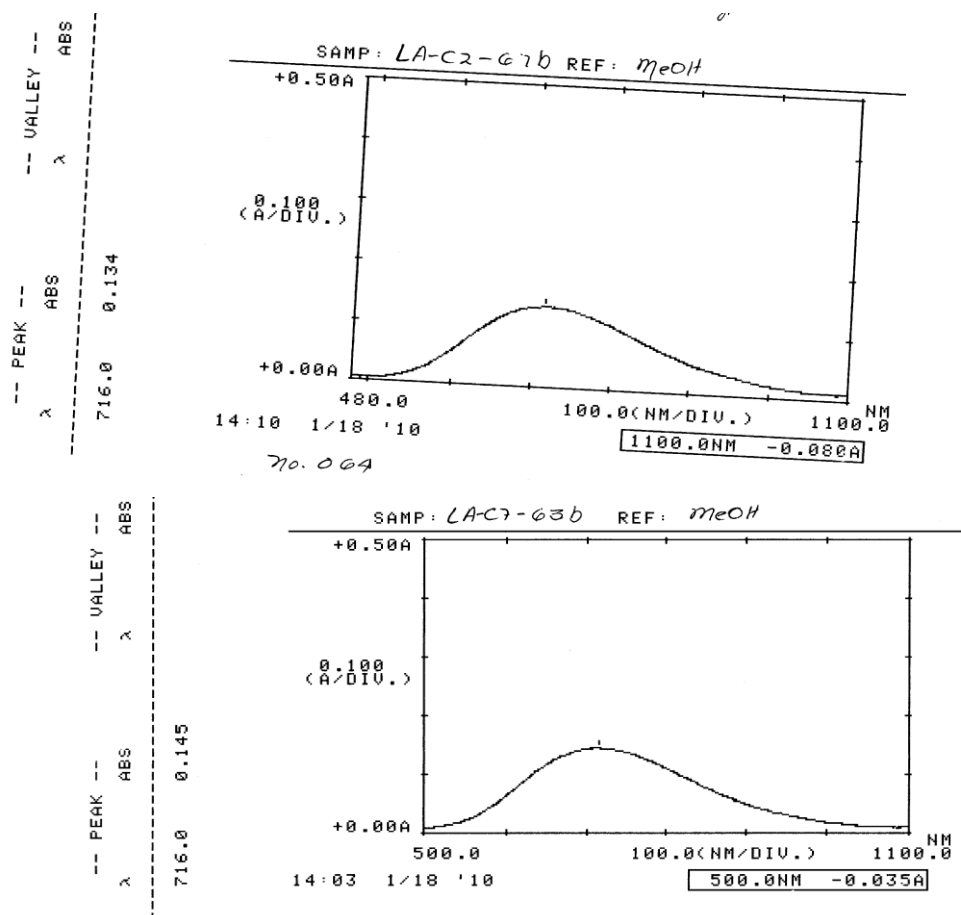

Figure S1. UV-vis spectra of complexes 1 and 2.

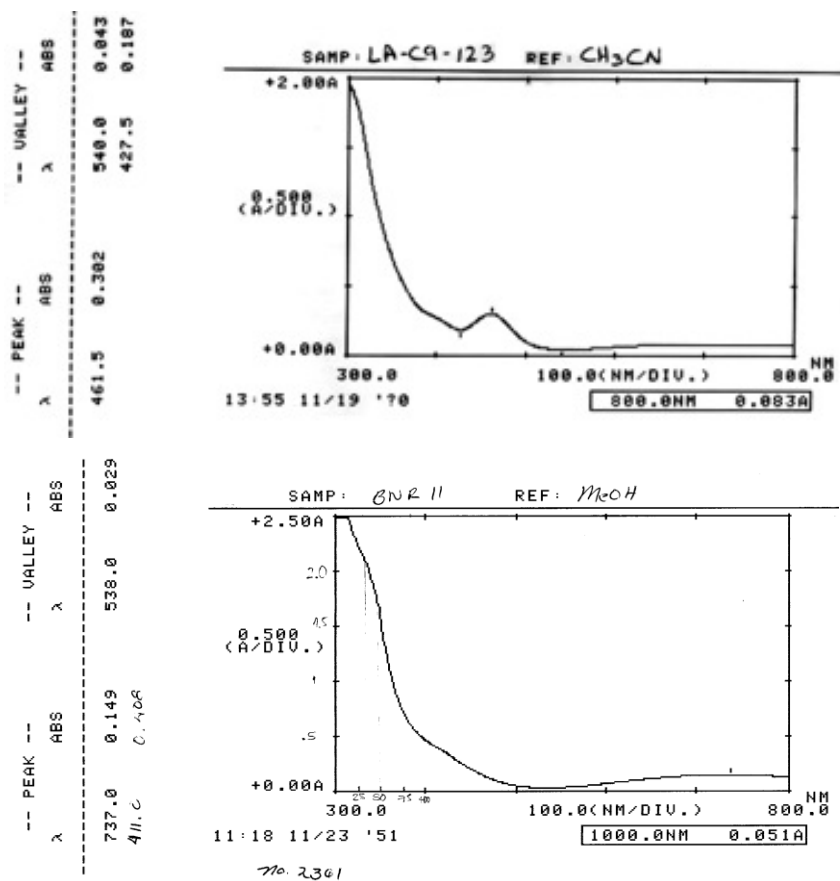

Figure S2. UV-vis spectra of complexes **3** and **3<sup>Me</sup>**.

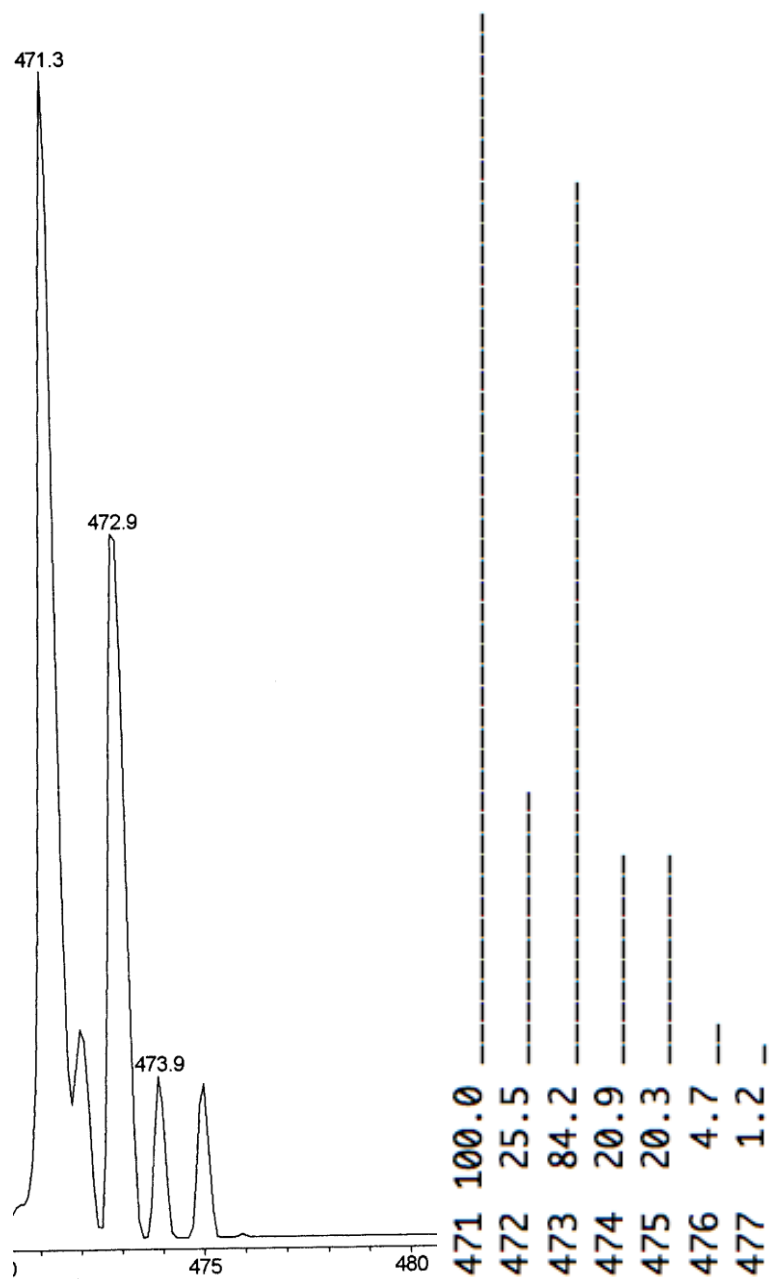

Figure S3. ESI-MS of complex 1 and simulation with isotopic pattern.

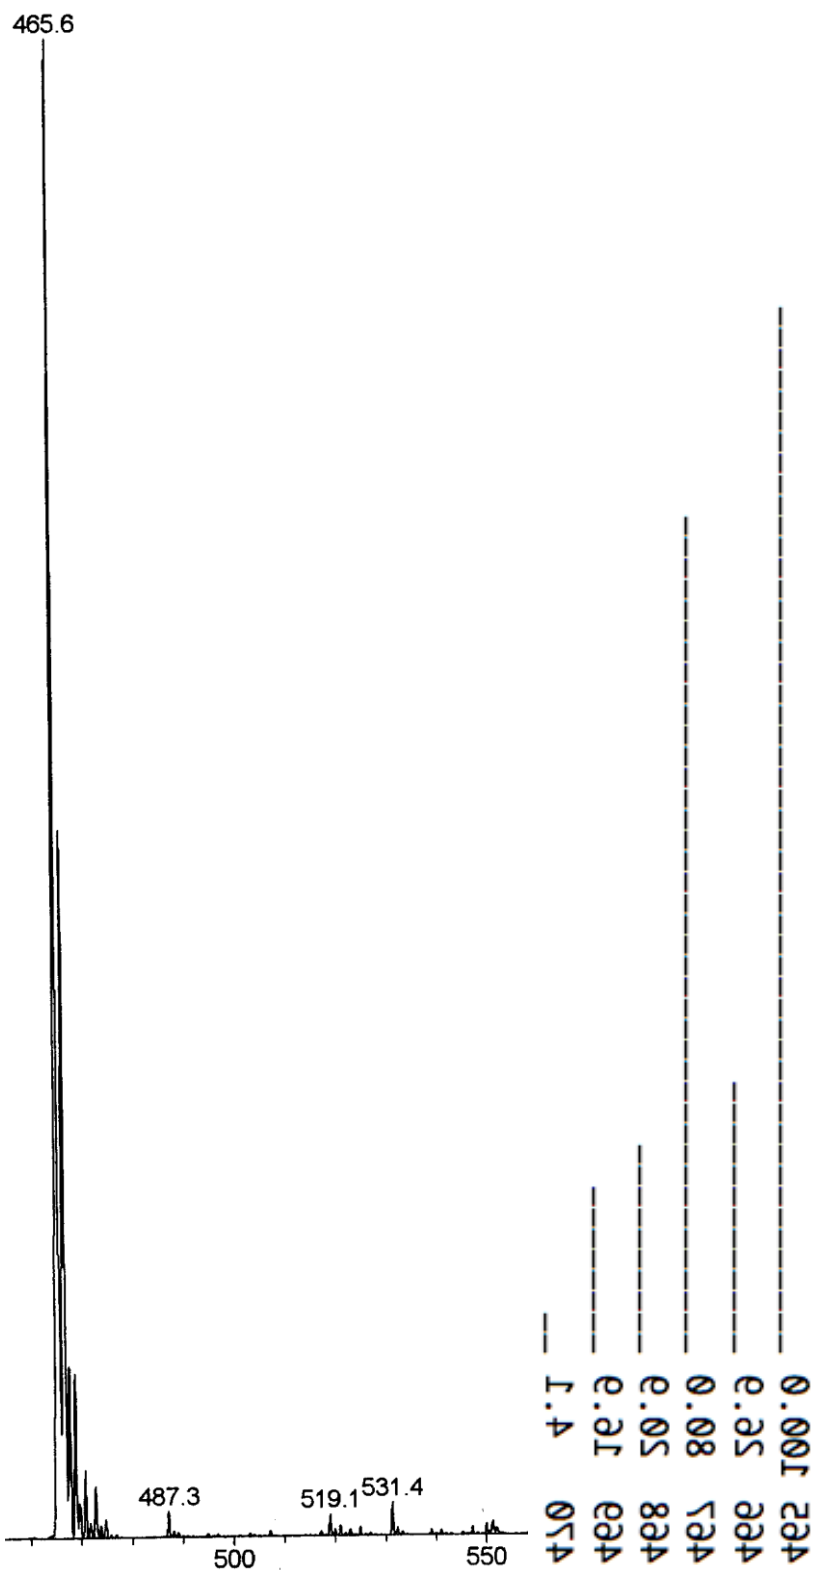

Figure S4. ESI-MS of complex 2 and simulation with isotopic pattern.

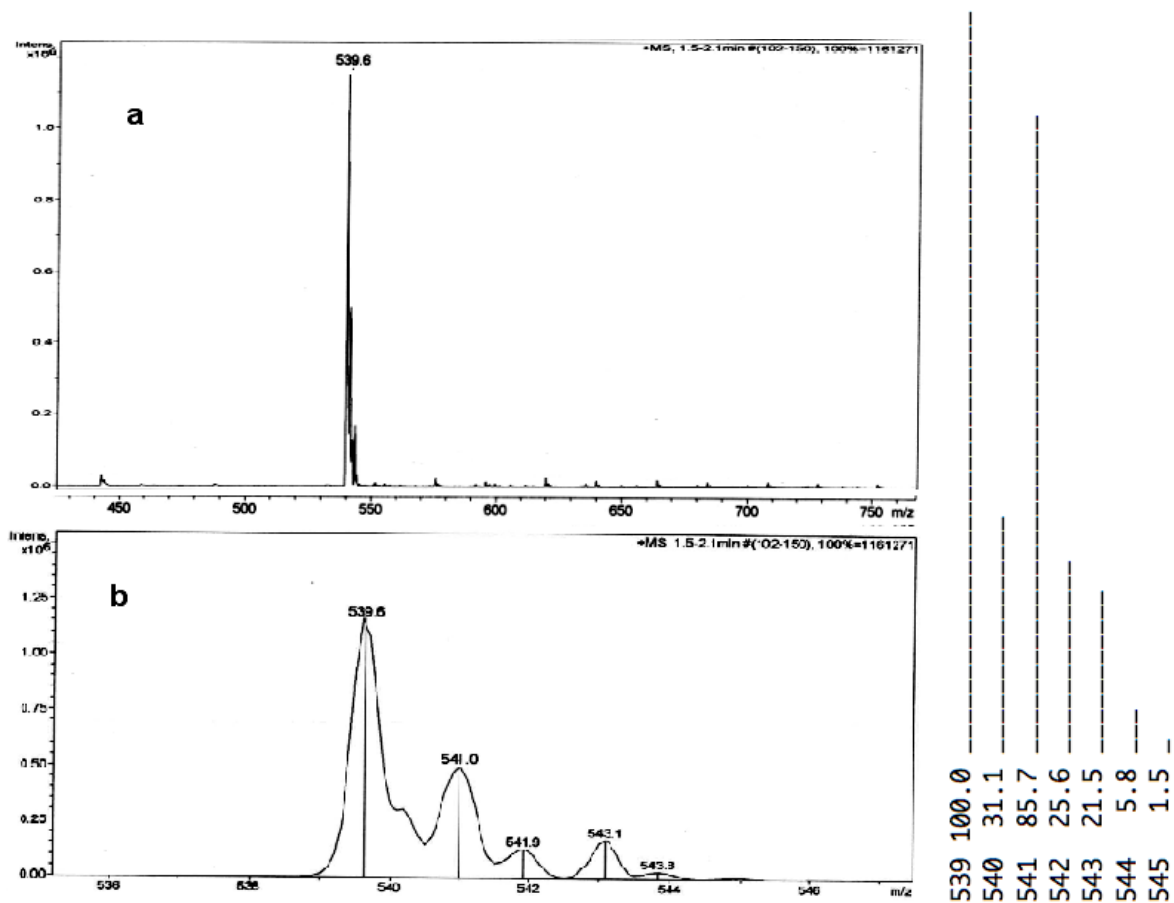

Figure S5. ESI-MS of complex 3 and simulation with isotopic pattern.

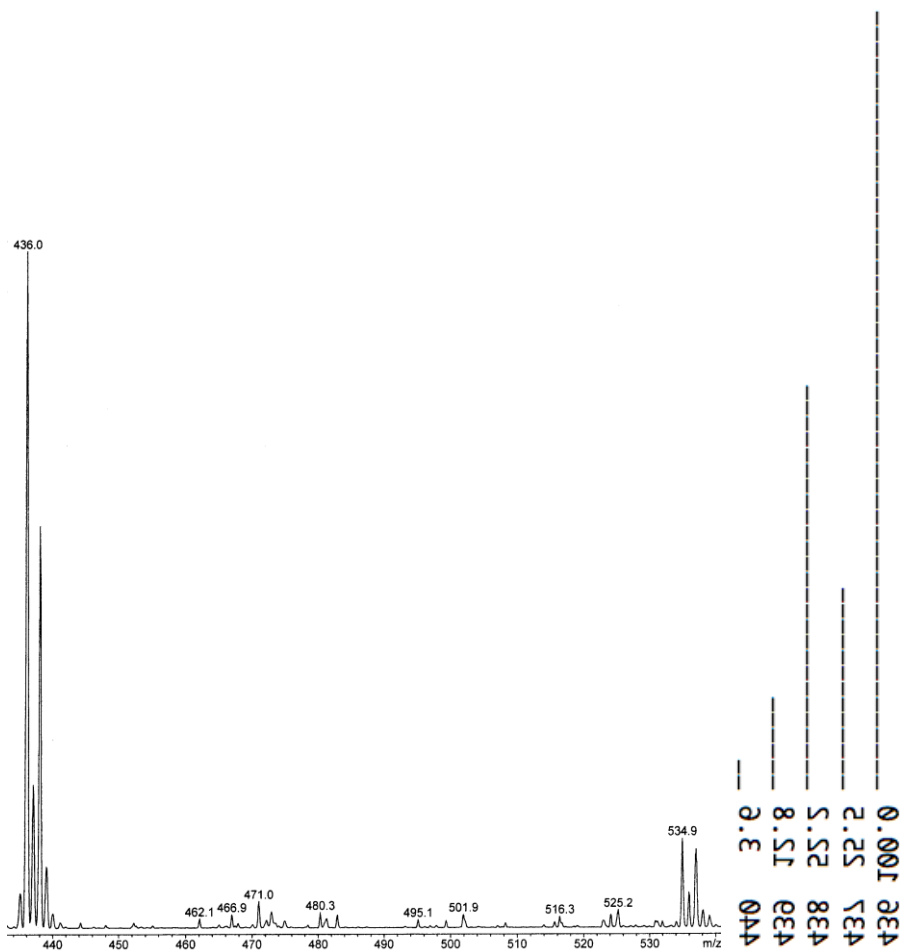

Figure S6. ESI-MS of complex **4** and simulation with isotopic pattern.

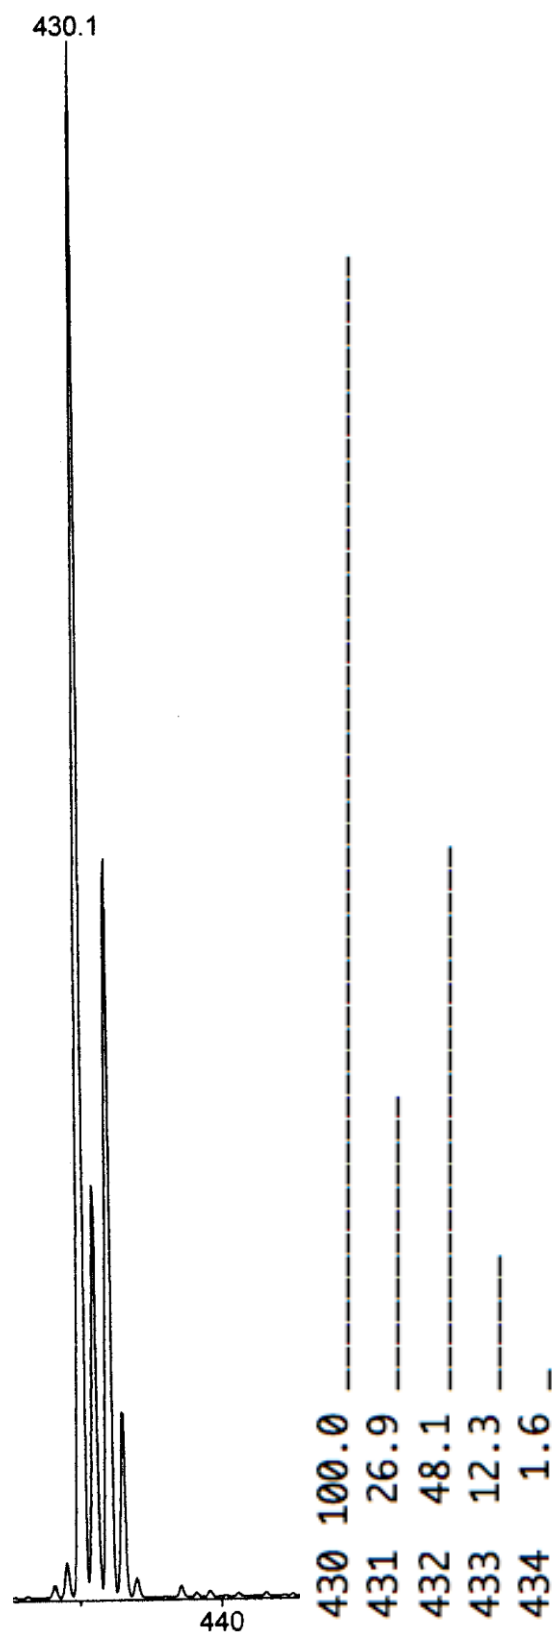

Figure S7. ESI-MS of complex **5** and simulation with isotopic pattern.

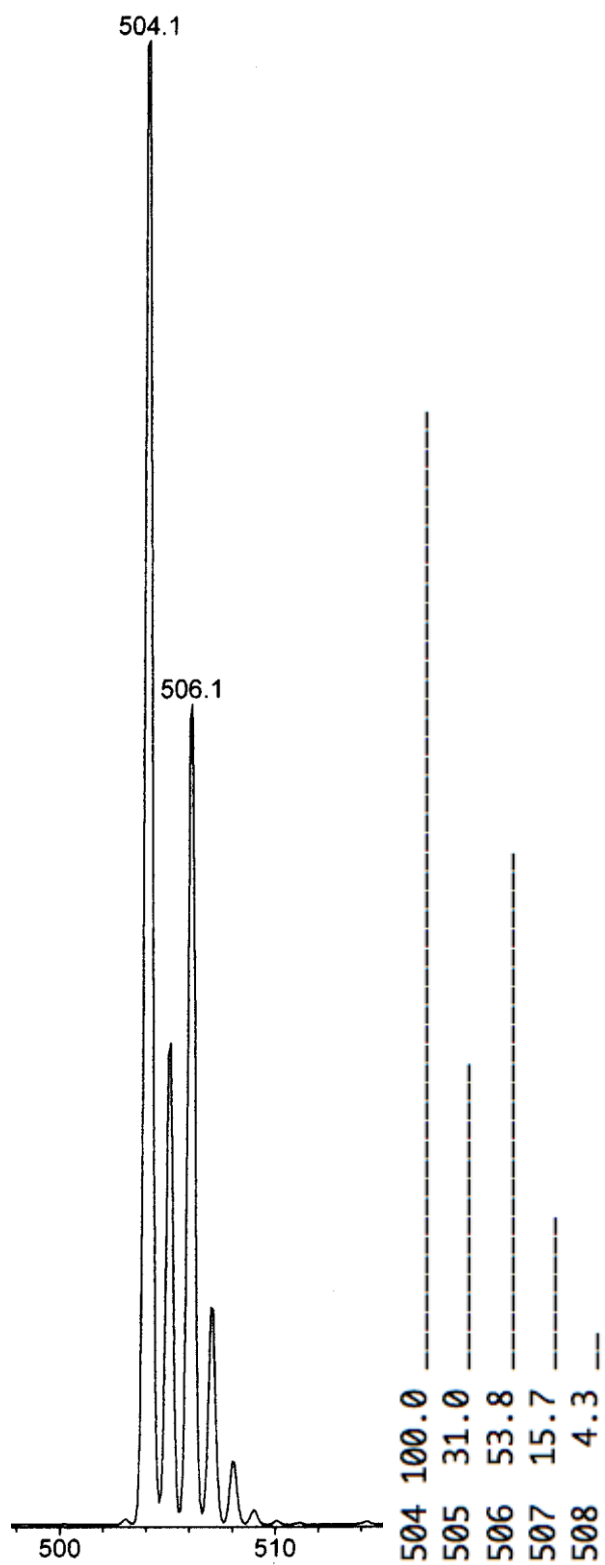

Figure S8. ESI-MS of complex **6** and simulation with isotopic pattern.



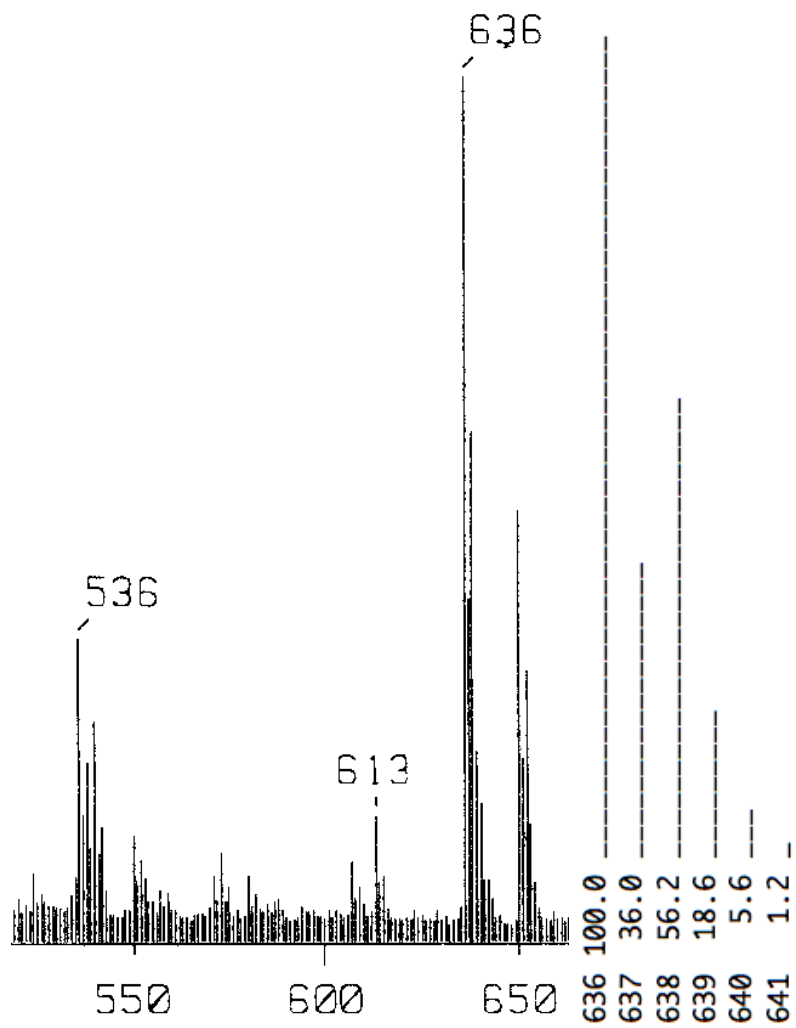

Figure S9. FAB-MS of complex  $4^{\text{BOC}}$  and simulation with isotopic pattern.

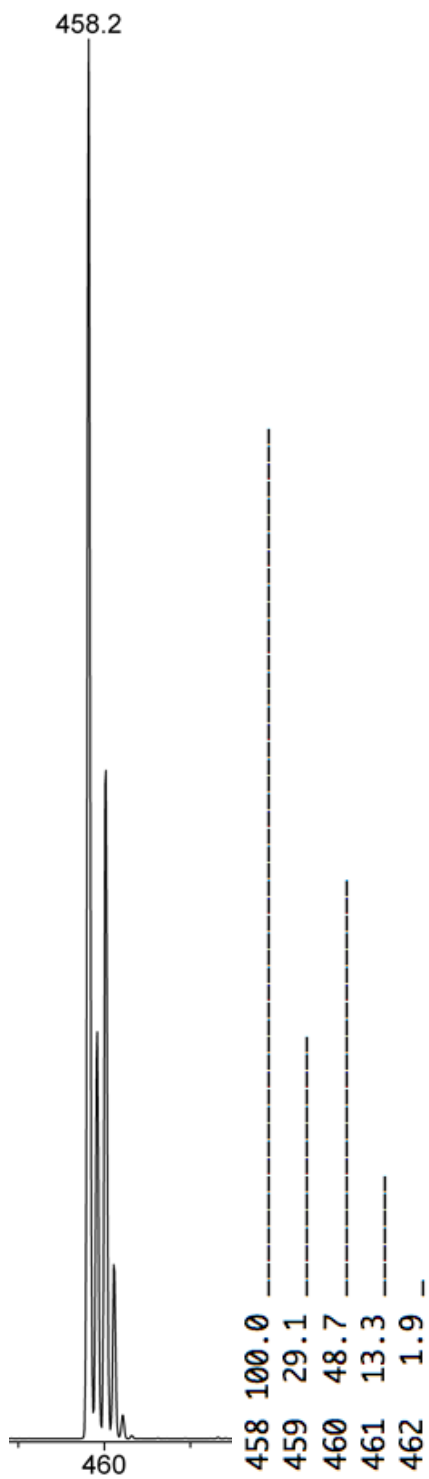

Figure S10. ESI-MS of complex  $5^{\text{Me}}$  and simulation with isotopic pattern.

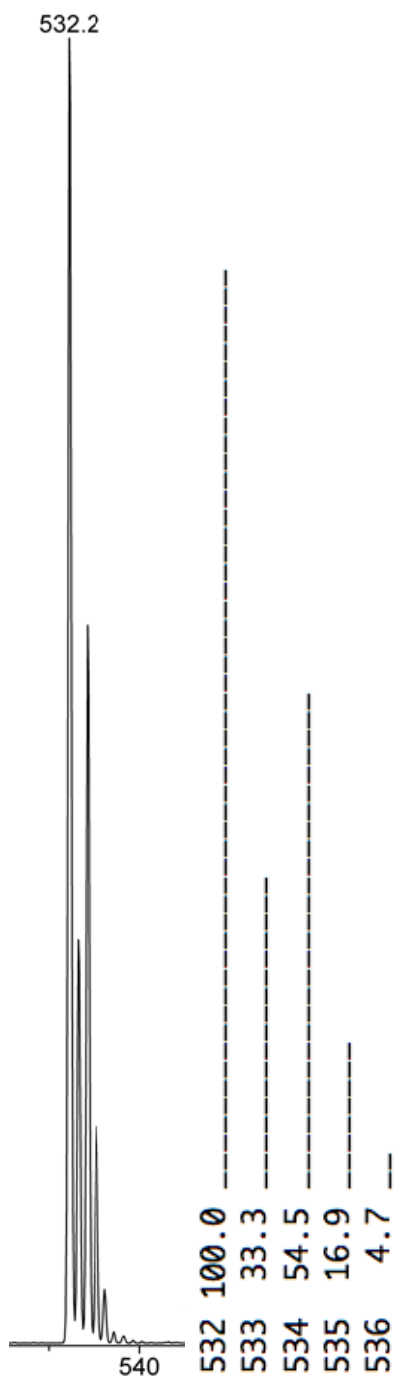

Figure S11. ESI-MS of complex 6<sup>Me</sup> and simulation with isotopic pattern.

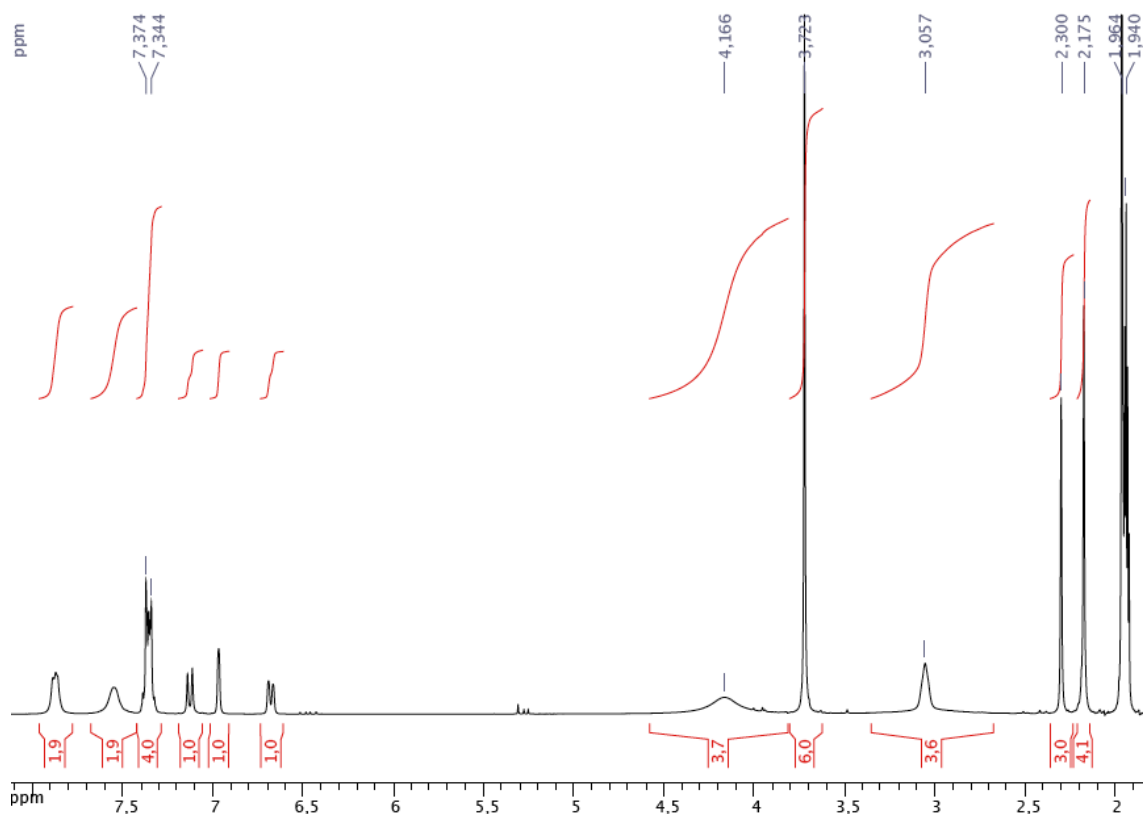

Figure S12.  $^1\text{H}$  NMR spectrum of complex  $6^{\text{Me}}$  in  $\text{CD}_3\text{CN}$ .

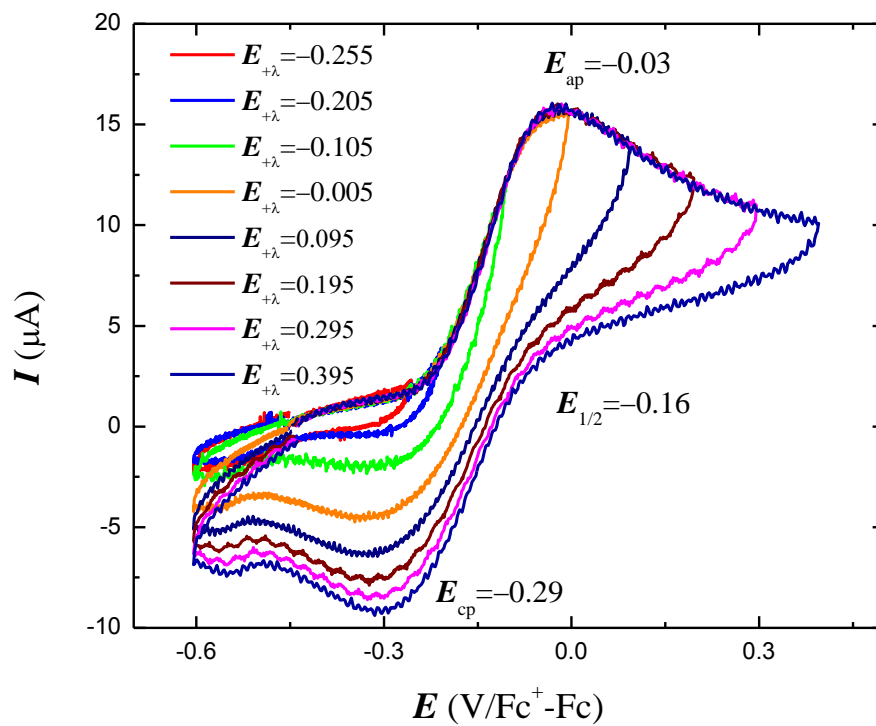

Figure S13. Representative cyclic voltammograms of 1 mM solutions of complex  $6^{\text{Me}}$  in 0.1 M  $\text{Bu}_4\text{NPF}_6$  in acetonitrile, at different inversion potential values.

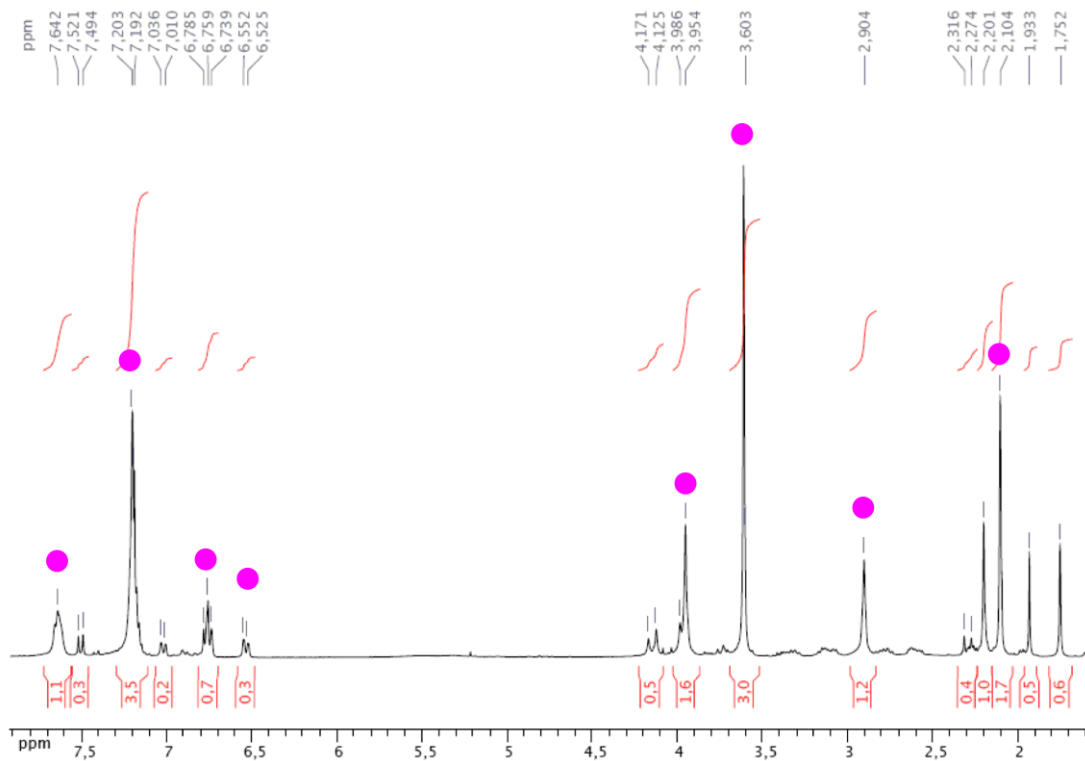

Figure S14.  $^1\text{H}$  NMR spectrum of the ligand-oxidation products of  $6^{\text{Me}}$  in  $\text{CDCl}_3$ ; resonances marked with a pink circle correspond to ligand  $\text{Me}_2\text{L}^3$ .

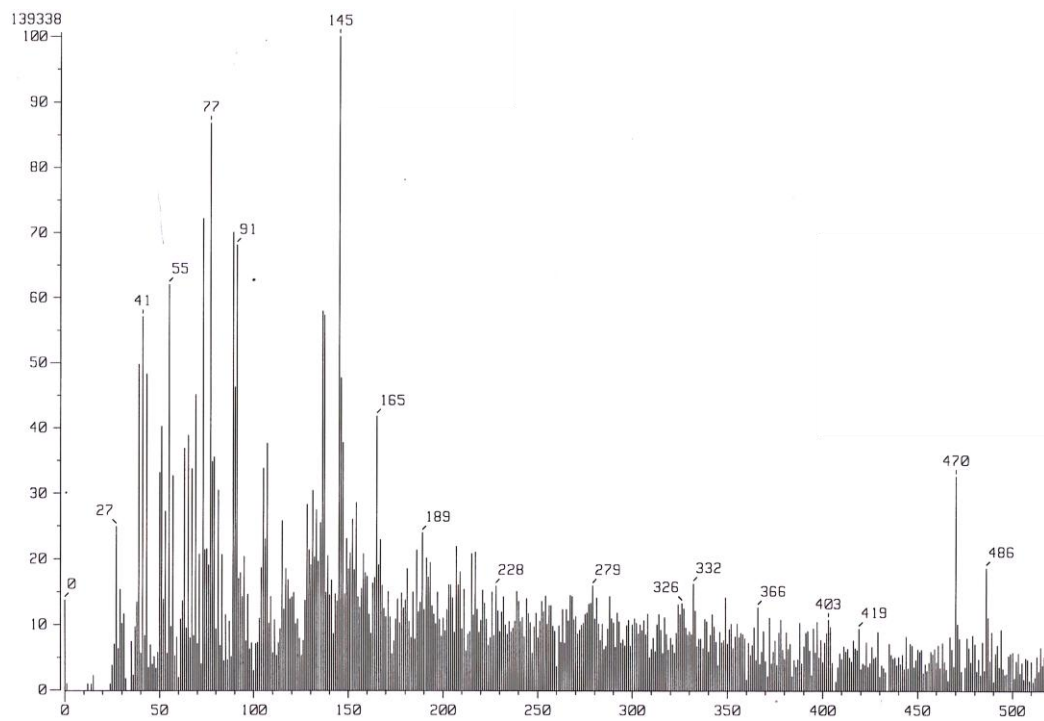

Figure S15. FAB-MS of the ligand-oxidation products of  $6^{\text{Me}}$ , the peak at  $m/z = 470$  corresponds to ligand  $\text{Me}_2\text{L}^3$ .

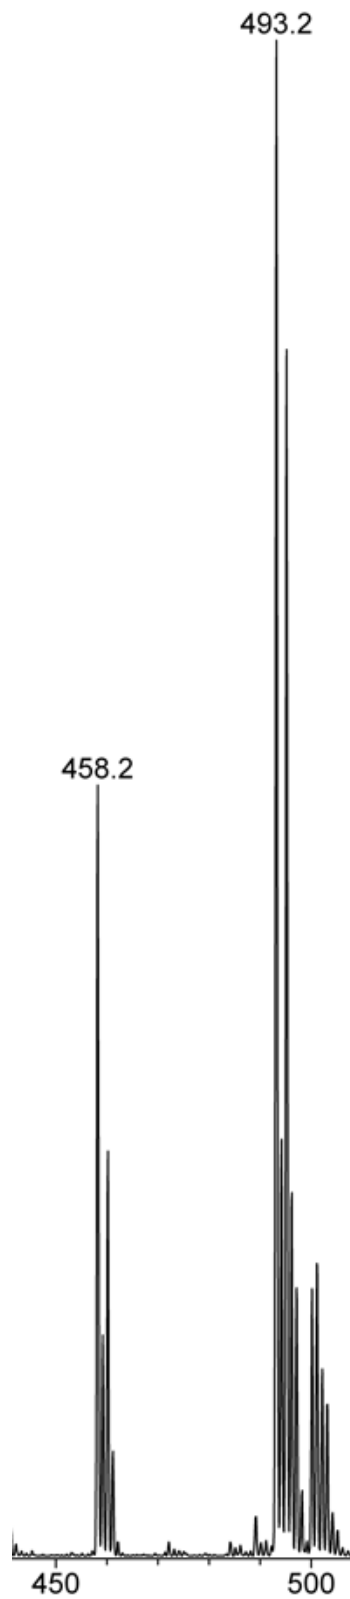

Figure S16. ESI-MS spectrum of  $5^{\text{Me}}$  after exposure to  $\text{O}_2$  in acetonitrile solution.

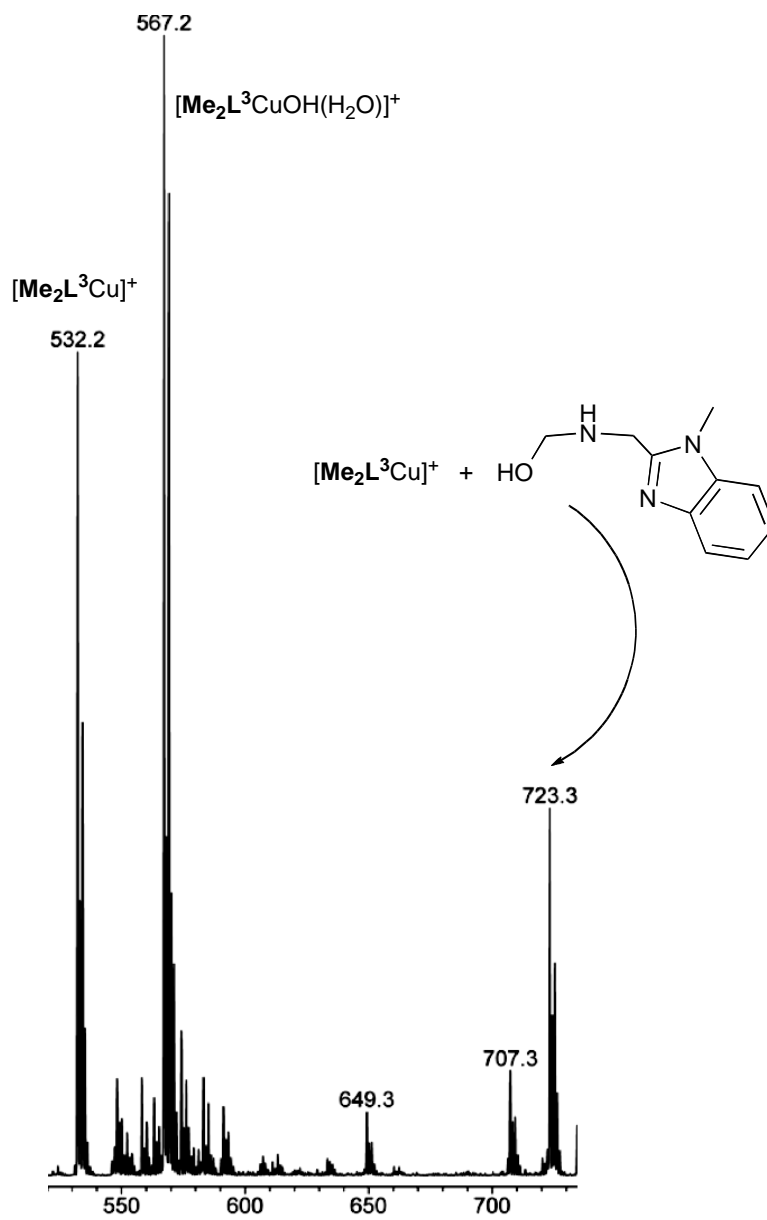

Figure S17. ESI-MS of the oxygenation products of  $6^{\text{Me}}$  in acetonitrile.

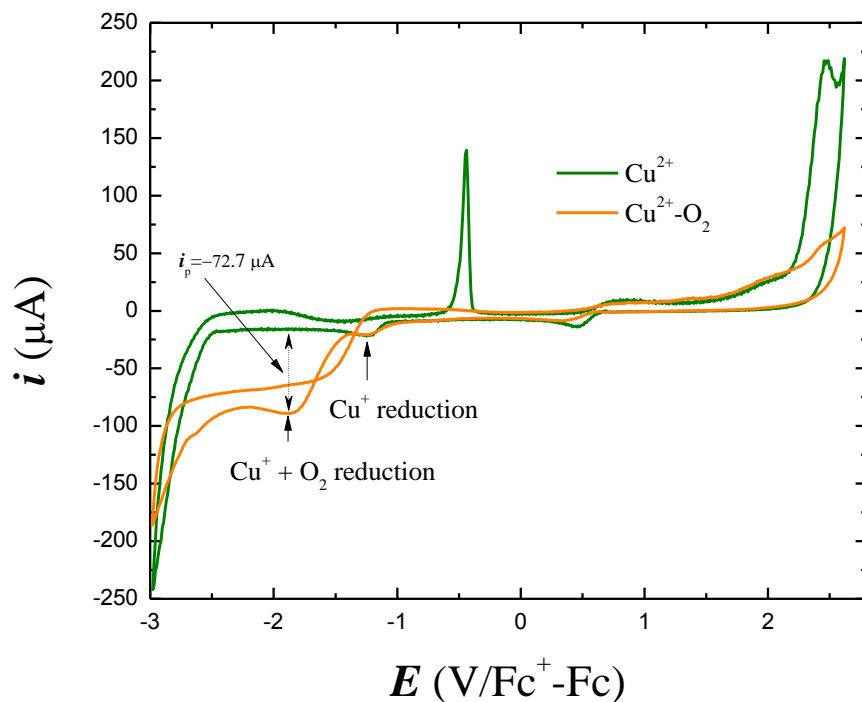

Figure S18. Representative voltammogram of 1 mM acetonitrile solution of  $\text{Cu}(\text{NO}_3)_2$  at  $-13^\circ\text{C}$ : under  $\text{N}_2$  atmosphere (green line), in the presence of  $\text{O}_2$  (yellow line).

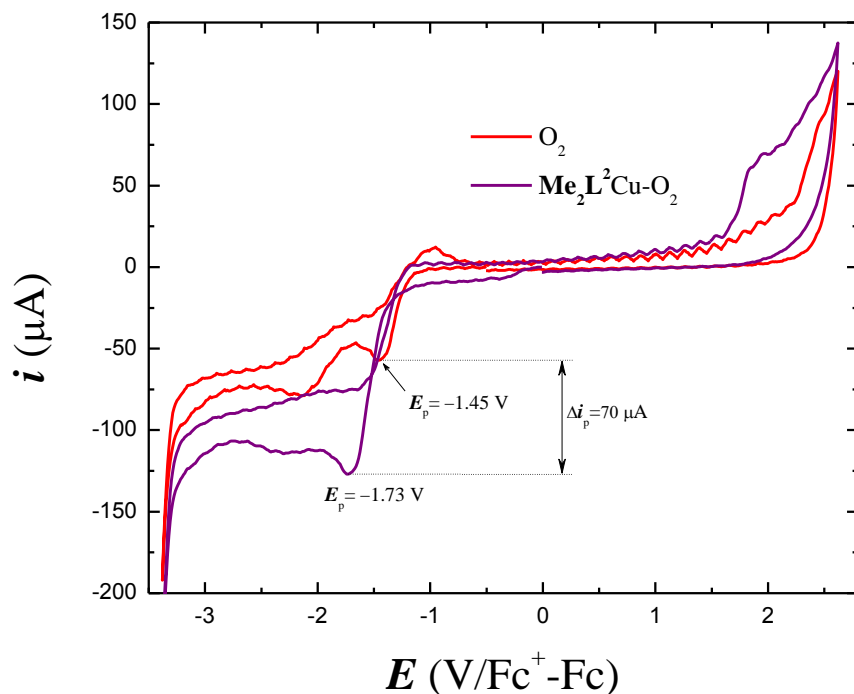

Figure S19. Representative voltammogram of 1 mM acetonitrile solution of  $5^{\text{Me}}$  at  $-13^\circ\text{C}$  with glassy carbon electrode ( $\phi = 7.1 \text{ mm}^2$ ) and 0.1 M  $\text{NBu}_4\text{PF}_6$  as supporting electrolyte: Reduction of  $\text{O}_2$  (red line), reduction of  $5^{\text{Me}}$  under  $\text{O}_2$  (purple line).



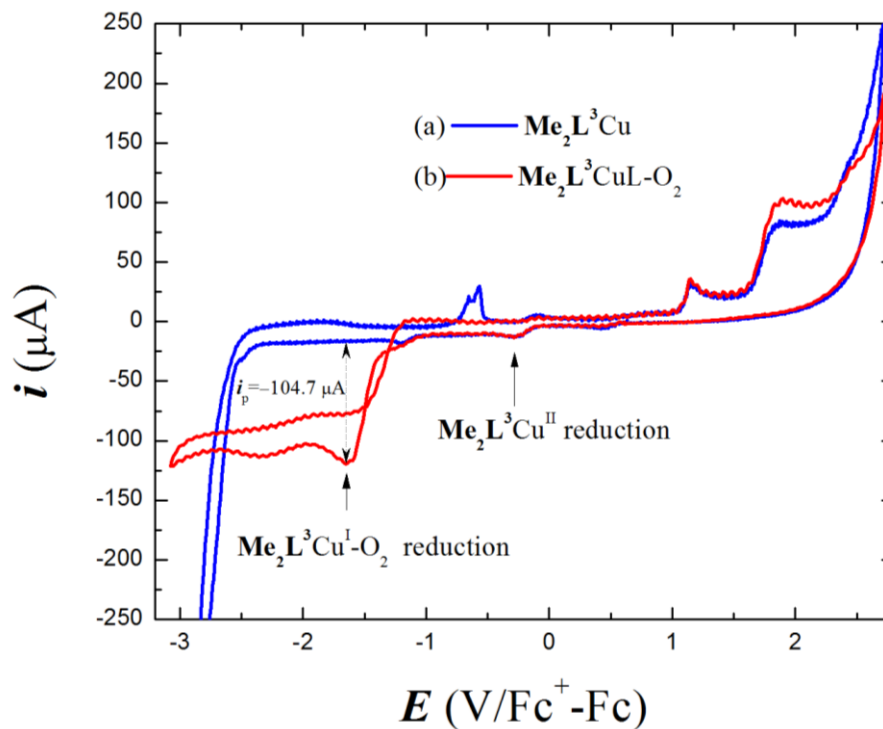

Figure S20. Representative cyclic voltammograms of 1 mM solutions of complex  $6^{\text{Me}}$  in 0.1 M  $\text{Bu}_4\text{NPF}_6$  in acetonitrile at  $-13^\circ\text{C}$ , measured with a glassy carbon electrode.

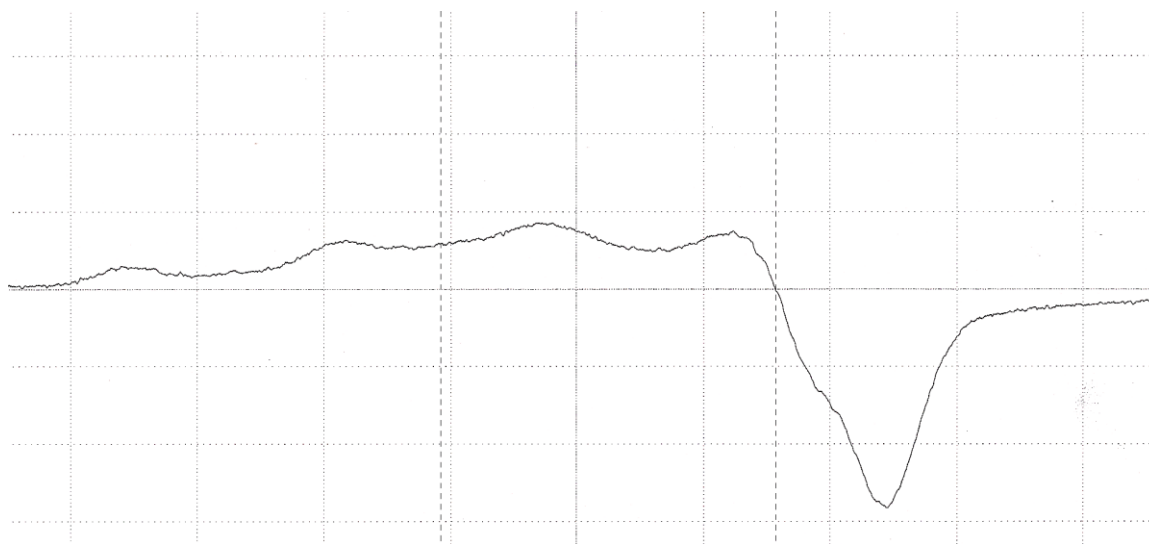

Figure S21. ESR spectrum of  $5^{\text{Me}}$  after exposure to  $\text{O}_2$  for 1 h at  $-78^\circ\text{C}$  in THF.

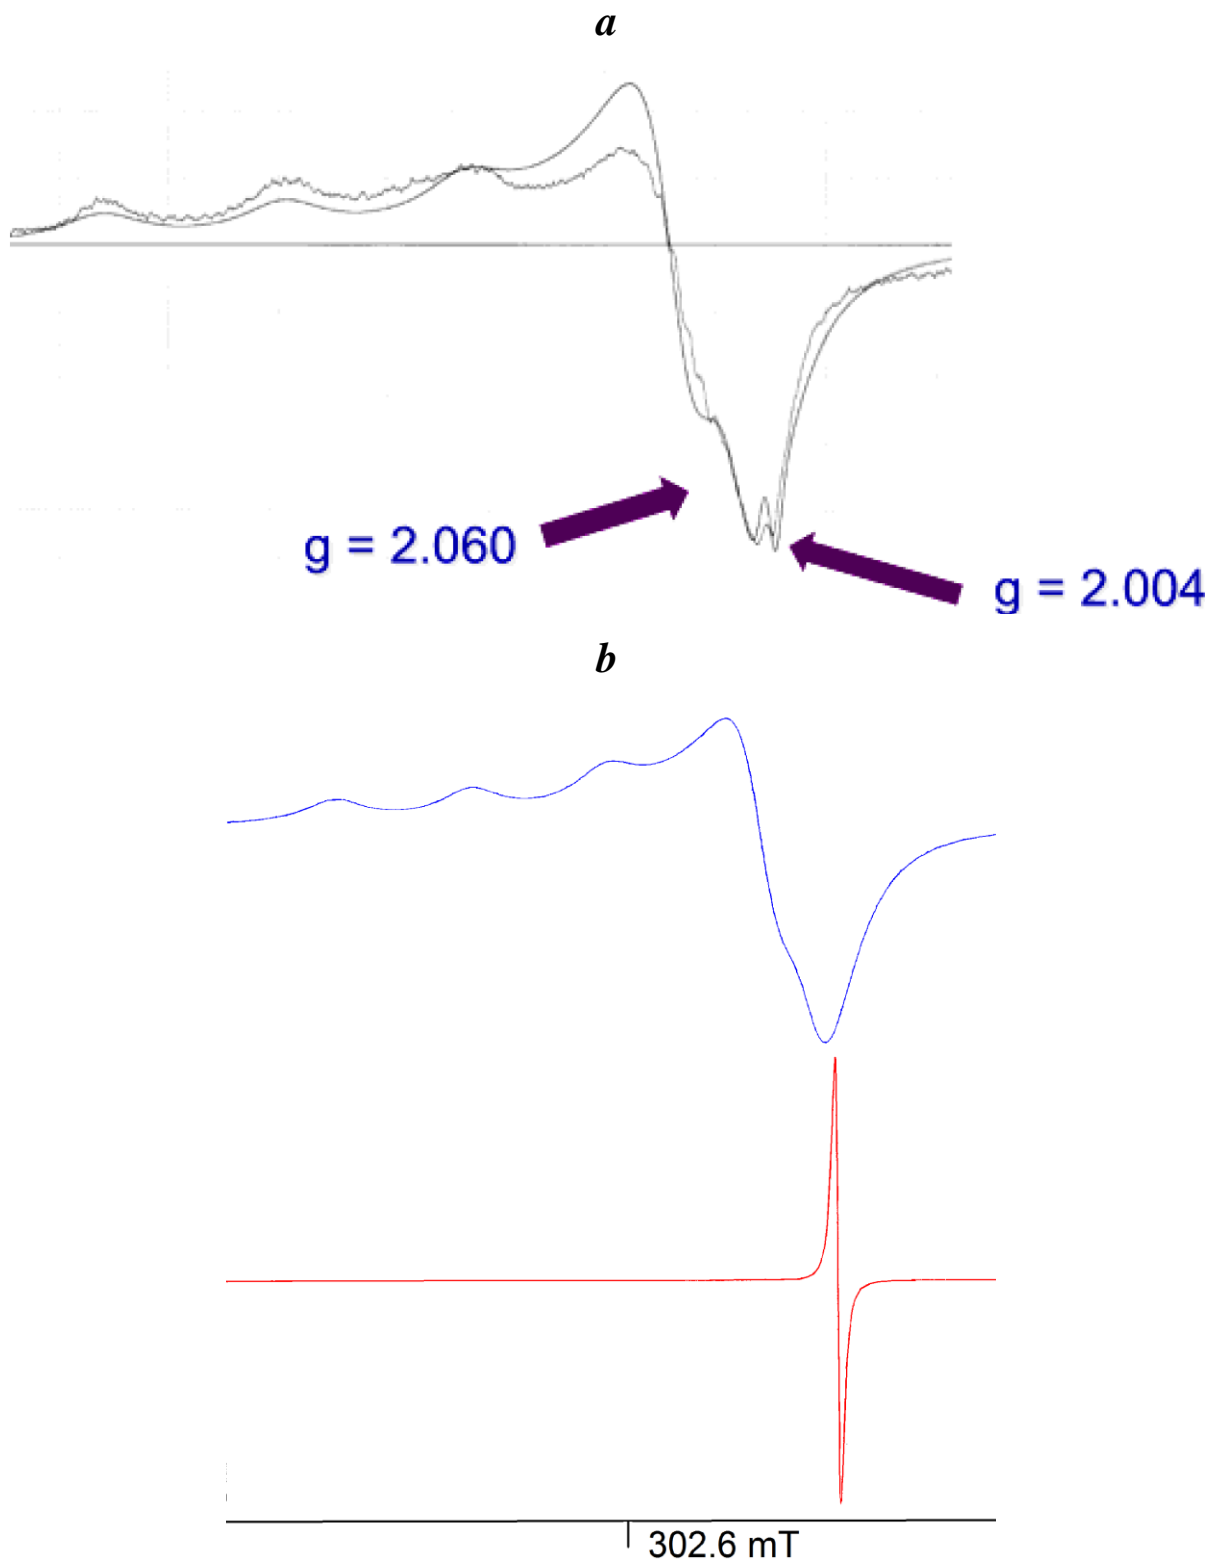

Figure S22. a) ESR spectrum and simulation of  $6^{\text{Me}}$  after exposure to  $\text{O}_2$  for 1 h at  $-78^\circ\text{C}$  in THF; b) Deconvoluted simulated spectra of  $\text{Cu}^{2+}$  complex and  $\text{O}_2^{\cdot-}$ .

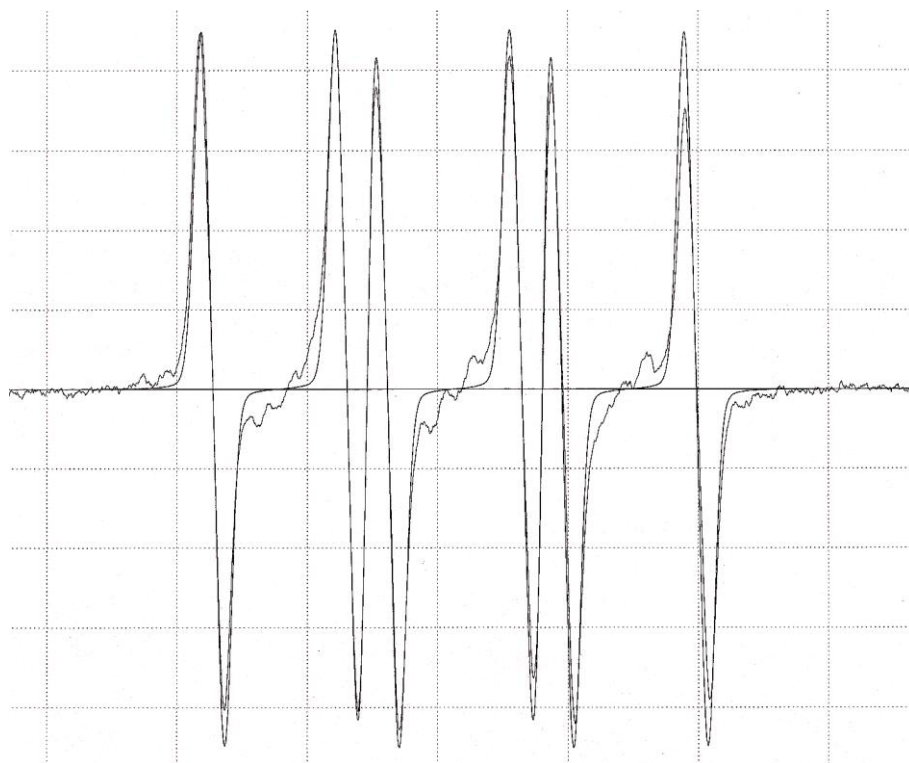

Figure S23. ESR spectrum and simulation of the DMPO-O<sub>2</sub><sup>•-</sup> adduct obtained by oxygenation of **6**<sup>Me</sup> in THF.
